# Supplementary material for: Measurement report: Size-resolved mass concentration of equivalent black carbon-containing particles larger than 700 nm and their role in radiation
Source: Copernicus journal article supplement (doi:10.5194/acp-23-14889-2023), 2023-12-01
Supplement: Supplementary file 1 [file acp-23-14889-2023-supplement.pdf]

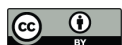

*Supplement of*

## **Measurement report: Size-resolved mass concentration of equivalent black carbon-containing particles larger than 700 nm and their role in radiation**

**Weilun Zhao et al.**

*Correspondence to:* Chunsheng Zhao (zcs@pku.edu.cn)

The copyright of individual parts of the supplement might differ from the article licence.

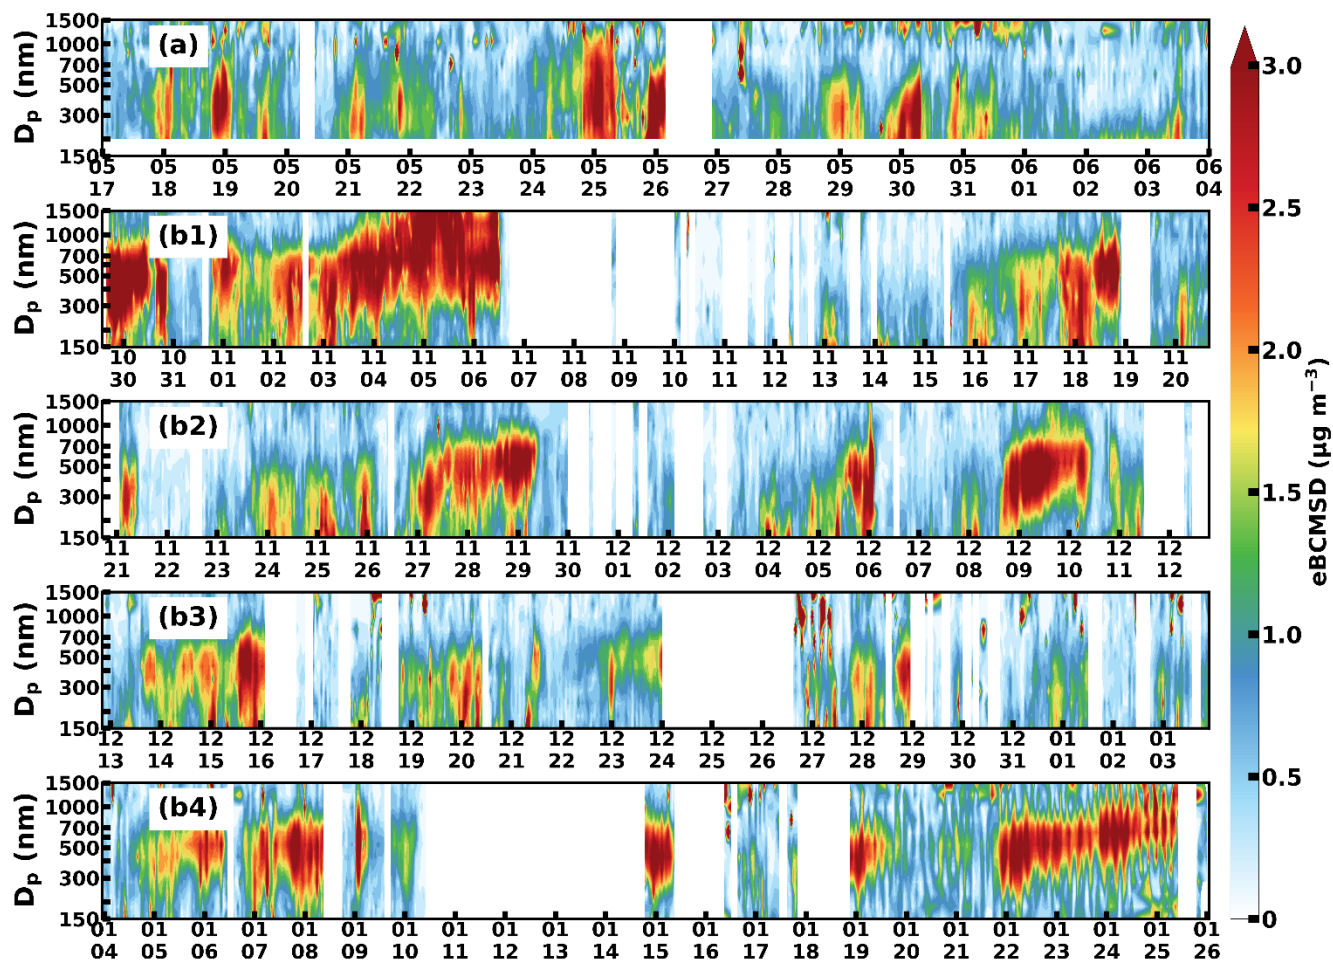

Figure S1: Time series of eBCMSD measured in (a) Changzhou from May 17<sup>th</sup> 2021 to June 3<sup>rd</sup> 2021 and (b1 – b4) Beijing October 29<sup>th</sup> 2021 to January 25<sup>th</sup> 2022. (b1) to (b4) corresponded to different time ranges.

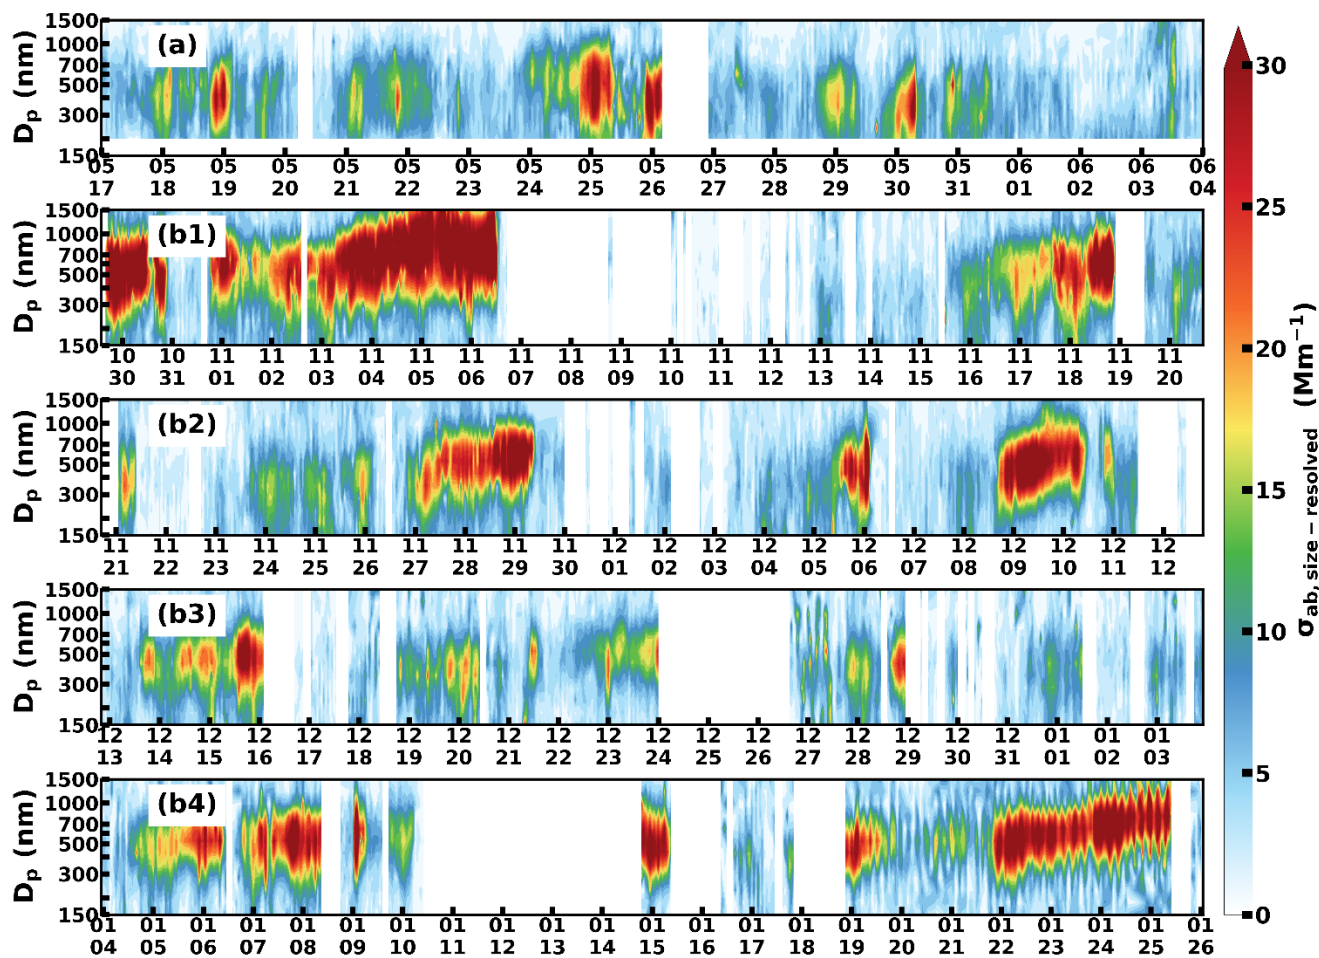

Figure S2: Time series of  $\sigma_{ab, size-resolved}$  measured in (a) Changzhou from May 17<sup>th</sup> 2021 to June 3<sup>rd</sup> 2021 and (b1 – b4) Beijing October 29<sup>th</sup> 2021 to January 25<sup>th</sup> 2022. (b1) to (b4) corresponded to different time ranges.

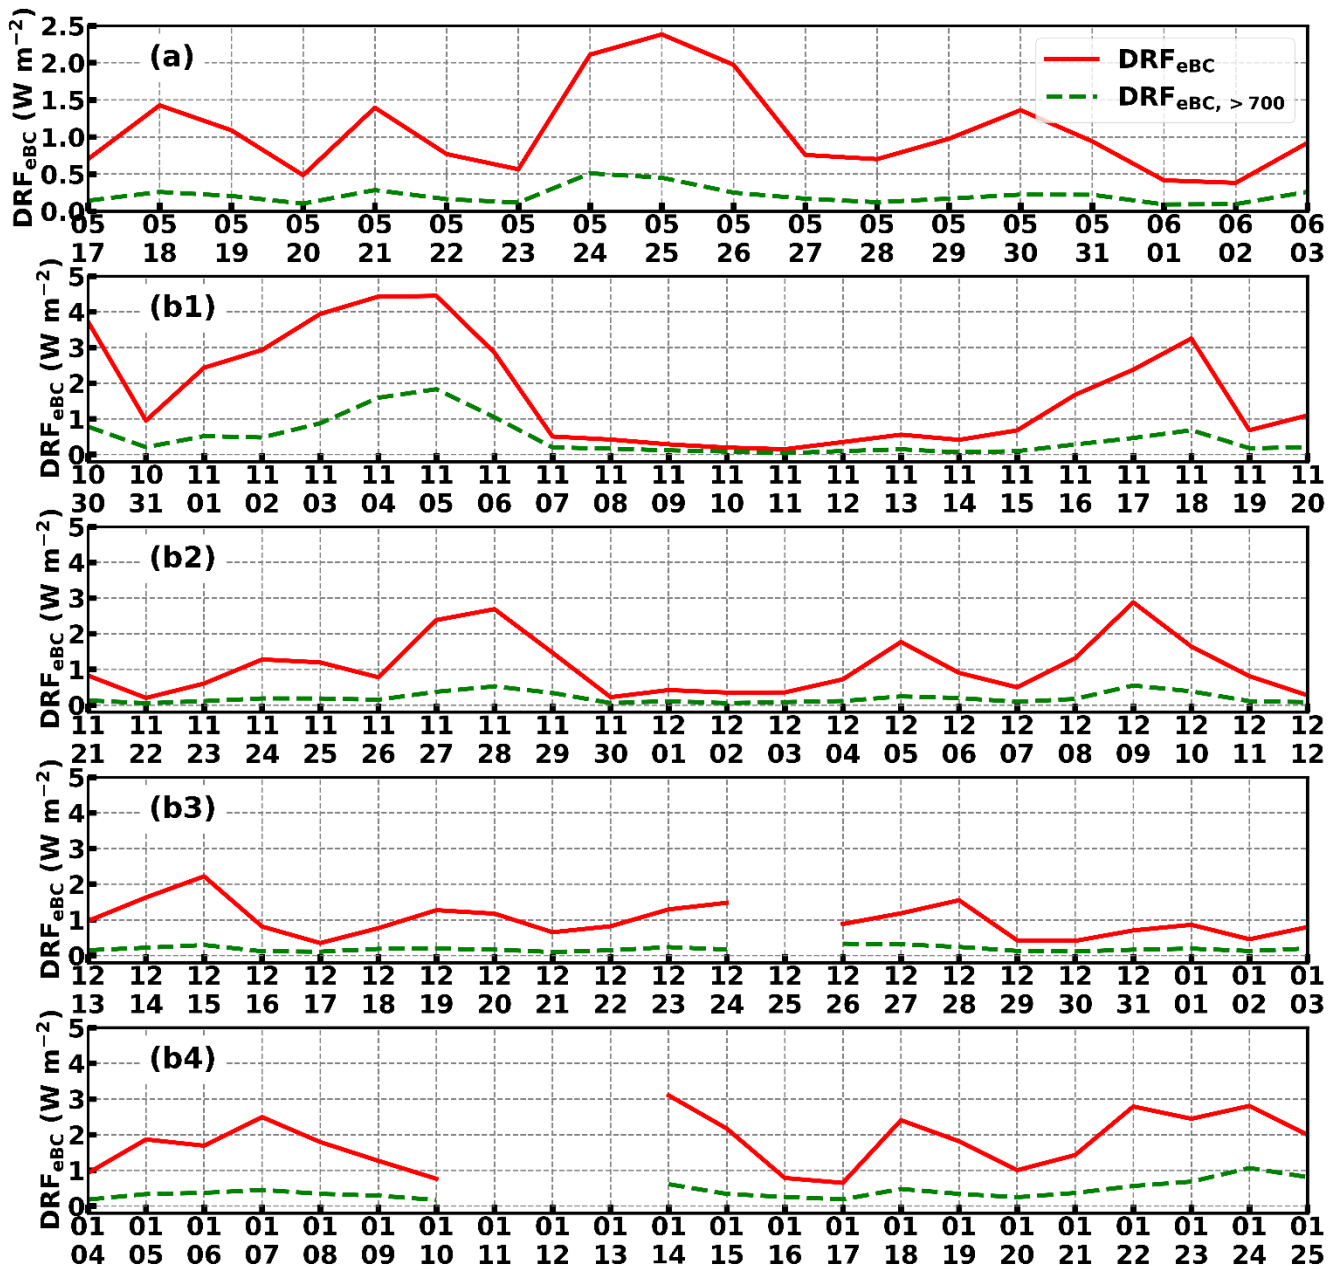

Figure S3: Time series of DRF<sub>eBC</sub> (red solid line) as well as DRF<sub>eBC, >700</sub> (green dashed line) measured in (a) Changzhou from May 17<sup>th</sup> 2021 to June 3<sup>rd</sup> 2021 and (b1 – b4) Beijing October 29<sup>th</sup> 2021 to January 25<sup>th</sup> 2022. (b1) to (b4) corresponded to different time ranges.

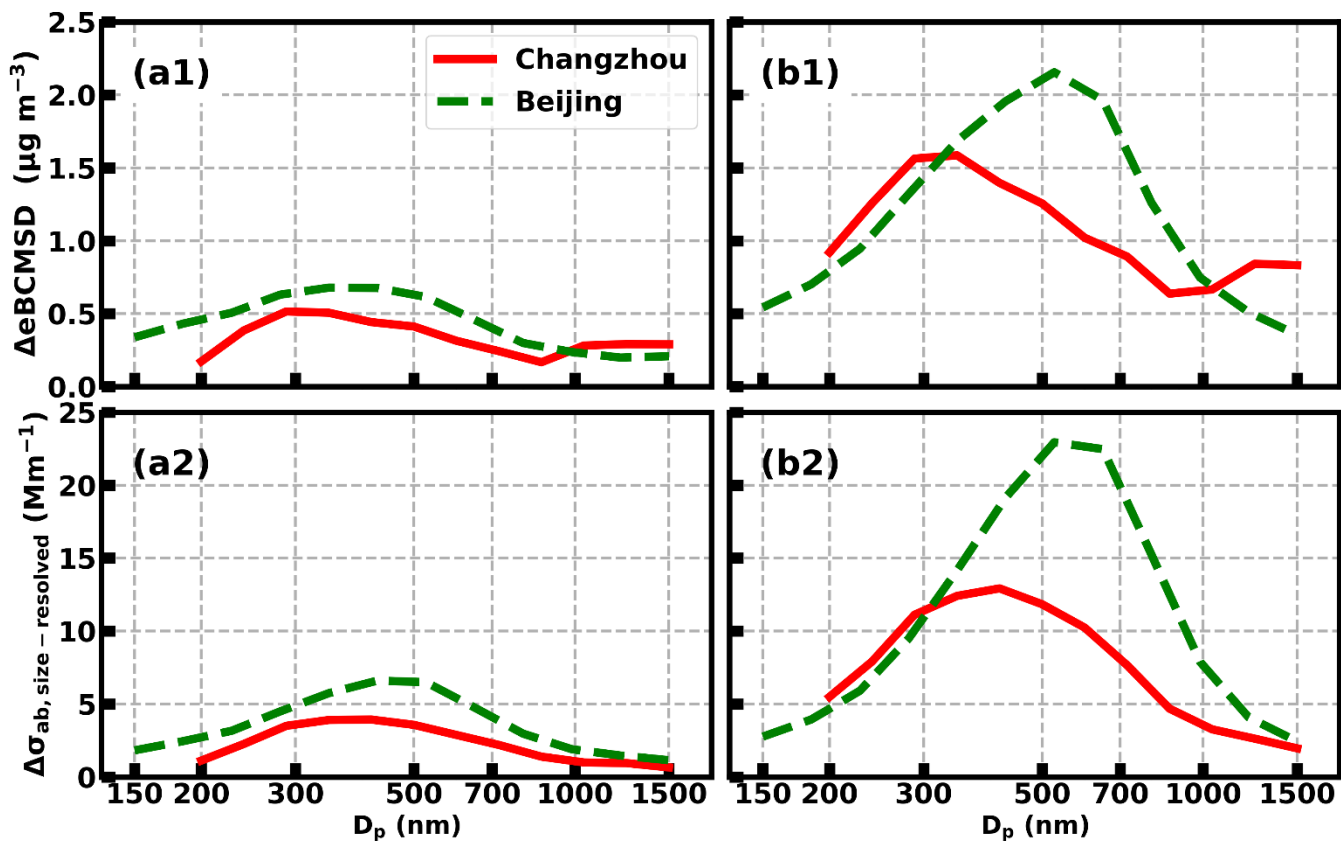

Figure S4: Increase of median eBCMSD in (a1) transitional and (b1) polluted period relative to clean period as well as increase of median  $\sigma_{ab, \text{size-resolved}}$  in (a2) transitional and (b2) polluted period relative to clean period. Red solid (green dashed) line stood for Changzhou (Beijing).
